# Supplementary material for: Snap29 Is Dispensable for Self-Renewal Maintenance but Required for Proper Differentiation of Mouse Embryonic Stem Cells
Source: MDPI journal article supplement (doi:10.3390/ijms24010750), 2023-01-01
Supplement: s1 [file s1]

*Supporting Information*

# **Snap29 Is Dispensable for Self-Renewal Maintenance but Required for Proper Differentiation of Mouse Embryonic Stem Cells**

**Yumei Jia <sup>1</sup>, Zhaoyuan Guo <sup>1</sup>, Jiahao Zhu <sup>1</sup>, Guanyu Qin <sup>1</sup>, Wenwen Sun <sup>1</sup>, Yu Yin <sup>2</sup>, Haiying Wang <sup>3</sup> and Renpeng Guo <sup>1,\*</sup>**

<sup>1</sup> College of Food Science and Technology, Nanjing Agricultural University, Nanjing 210095, China

<sup>2</sup> Yunnan Key Laboratory of Primate Biomedical Research, Institute of Primate Translational Medicine, Kunming University of Science and Technology, Kunming 650500, China

<sup>3</sup> State Key Laboratory of Medicinal Chemical Biology, Department of Cell Biology and Genetics, College of Life Sciences, Nankai University, Tianjin 300071, China

\* Correspondence: guorp@njau.edu.cn

**The Following Files are Included:**

**Supplementary Figures and Legends**

**Supplementary Figures S1–S3**

**Supplementary Tables S1–S3**

## Supplementary Figures and Legends

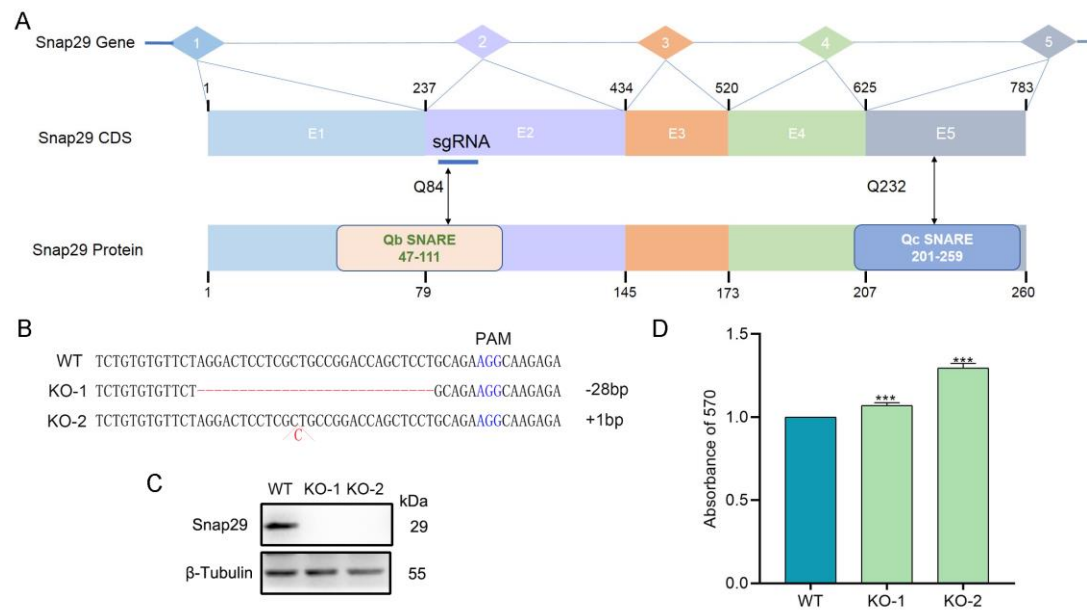

**Supplementary Figure S1. Targeted disruption of *Snap29* with CRISPR/Cas9 in mouse ESCs.**

(A) Illustration of mouse *Snap29* gene, its coding sequence (CDS) and Snap29 protein. The sgRNA was designed for targeting the second exon of *Snap29*.

(B) Sequencing data of *Snap29* mutations induced by CRISPR/Cas9 in ESC clones. Deletions are indicated by dashes, and PAM is shown in blue.

(C) Western blot analysis of Snap29 protein levels in *Snap29*<sup>+/+</sup> (WT) and *Snap29*<sup>-/-</sup> (KO-1 and KO-2) ESCs.

(D) MTT assay of WT, KO-1 and KO-2 ESCs. Mean  $\pm$  SEM from three independent experiments. \*\*\* $P < 0.001$ , unpaired two-tailed Student's  $t$ -test, compared with the WT group.

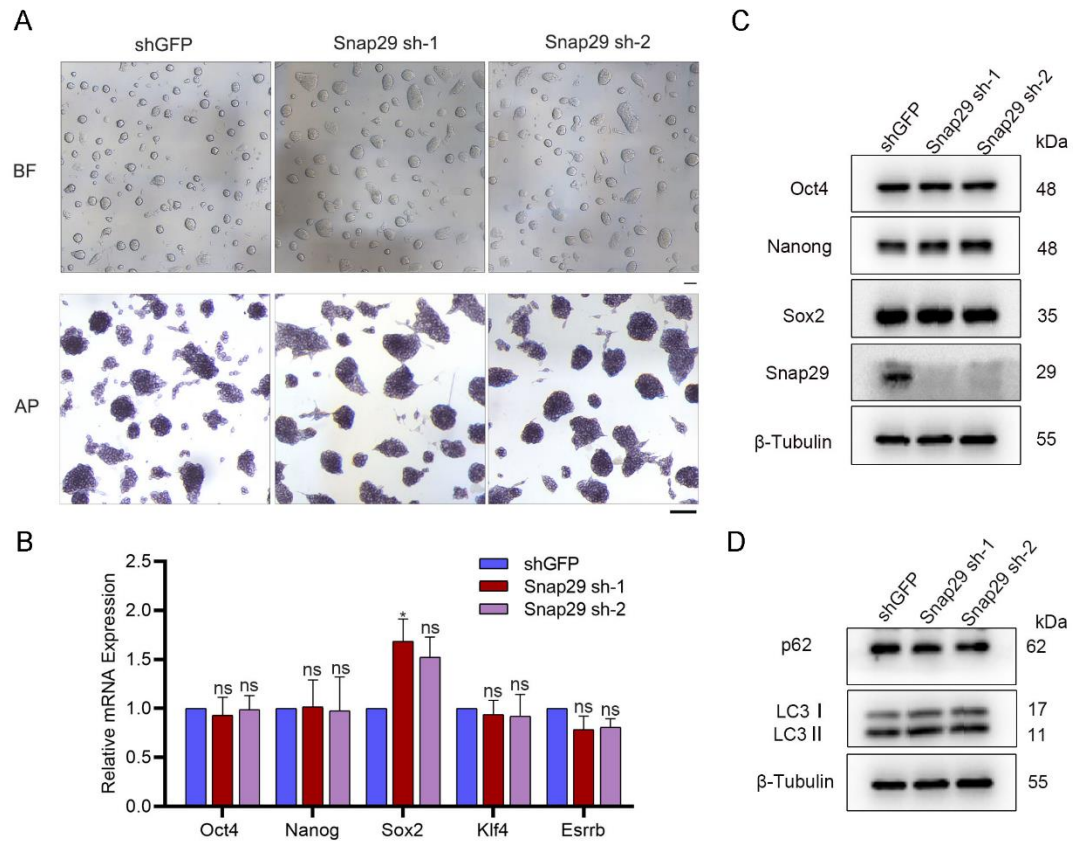

**Supplementary Figure S2. *Snap29* silencing does not damage self-renewal or autophagy of ESCs.**

(A) Morphology of control (shGFP) and *Snap29* knockdown ESCs under bright field (BF) and alkaline phosphatase (AP) staining analysis. Scale bar, 100  $\mu$ m.

(B) Relative mRNA levels of pluripotent marker genes measured by qPCR.

(C) Western blot analysis of Oct4, Nanog, Sox2 and Snap29 in control and *Snap29* knockdown ESCs.

(D) Western blot analysis of LC3 I/II and p62 in control and *Snap29* knockdown ESCs.

Mean  $\pm$  SEM from three independent experiments. \* $P < 0.05$ , ns not significant ( $P > 0.05$ ), unpaired two-tailed Student's *t*-test, compared with control groups.

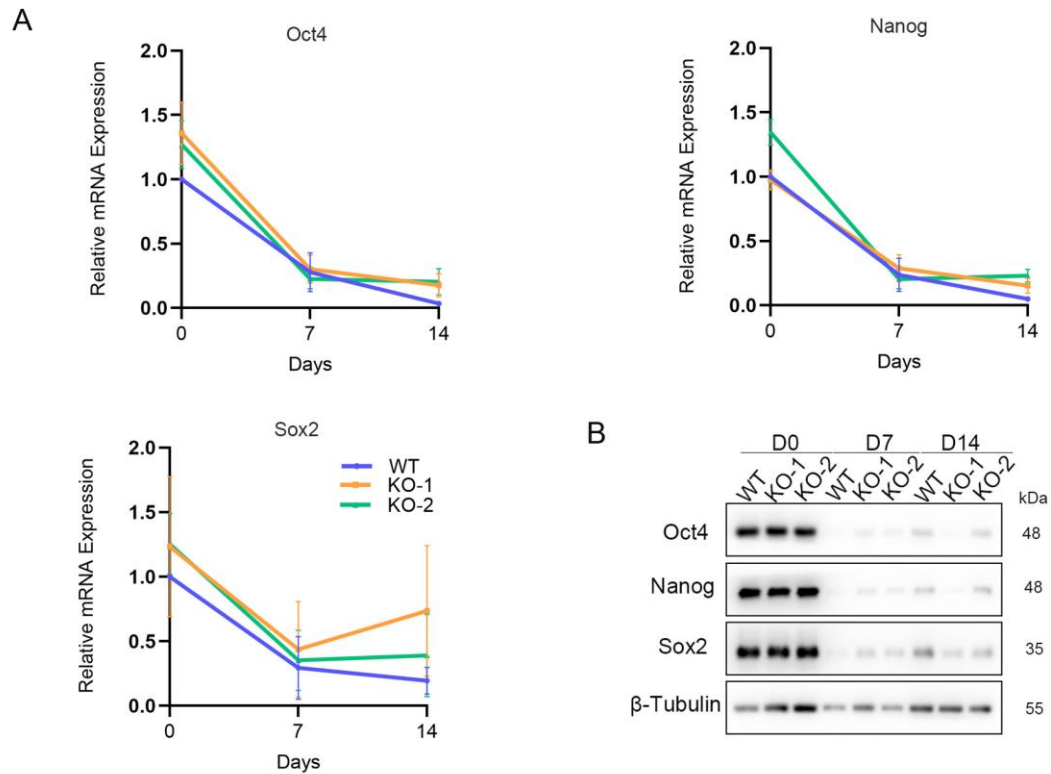

**Supplementary Figure S3. *Snap29* depletion does not impact the down-regulation of pluripotent genes.**

(A) Relative mRNA levels of pluripotent marker genes Oct4, Nanog and Sox2 at indicated time points of differentiation.

(B) Western blot analysis of Oct4, Nanog and Sox2 at indicated time points of differentiation.

Data represent mean  $\pm$  SEM from three independent experiments.

**Supplementary Table S1 Primers for qPCR analysis**

| Genes   | Forward                  | Reverse                   |
|---------|--------------------------|---------------------------|
| Oct4    | TTGGGCTAGAGAAGGATGTGGTT  | GGAAAAGGGACTGAGTAGAGTGTGG |
| Sox2    | GCACATGAACGGCTGGAGCAACG  | TGCTGCGAGTAGGACATGCTGTAGG |
| Nanog   | TTGCTTACAAGGGTCTGCTACT   | ACTGGTAGAAGAATCAGGGCT     |
| Klf4    | CCATCGGACCTACTTATCTGC    | AAAACCTCAAACCAAAAACCC     |
| Esrrb   | CAGGCAAGGATGACAGACG      | GAGACAGCACGAAGGACTGC      |
| Gata4   | GCTATGCATCTCCTGTCACTCAGA | CCAAGTCCGAGCAGGAATTTGAAG  |
| Gata6   | CTTCTCCTTCTACACAAGCGACCA | ATACTTGAGGTCACTGTTCTCGGG  |
| T       | CATCGGAACAGCTCTCCAACCTAT | TACCATTGCTCACAGACCAGAGAC  |
| Flk1    | CCTGGTCAAACAGCTCATCA     | AAGCGTCTGCCTCAATCACT      |
| Hand1   | AAGGATGCACAAGCAGGTGAC    | TTTAATCCTCTTCTCGCCGGG     |
| Fgf5    | GAAACTCGGATACAGCATCCCTCT | GGATCGCTACAGAGAATCCCCTT   |
| Nestin  | CTGGATCTGGAAGTCAACAGAGGT | ATCCTCAGTTTCCACTCCTGTAGC  |
| Cxcl10  | CCAAGTGCTGCCGTCAATTTTC   | GGCTCGCAGGGATGATTTCAA     |
| Acta1   | CCCAAAGCTAACC GGGAGAAG   | CCAGAATCCAACACGATGCC      |
| Trim54  | GGAGAAGCAGCTCATTGCGC     | CCTCCTGAAGACACCGTTGTG     |
| Jam2    | GTGCCCCTTCTGTTATGACTG    | TTCCCTAGCAAACCTTGTGCCA    |
| Col5a2  | TTGGAAACCTTCTCCATGTCAGA  | TCCCCAGTGGGTGTTATAGGA     |
| Fstl3   | CTGCCTCCCCTGCAAAGATTC    | CGGTACATGACGCGCAAGT       |
| Snap29  | AGGTTTACCCAAAGAACTCGACC  | TGGCCTAATCCCACGGACA       |
| Ttyh3   | AGAAAGACAGACGAGCACCTT    | CCGTAGAATCCCACTGCAATG     |
| Il3Ra   | CTGGCATCCCACTCTTCAGAT    | GGTCCCAGCTCAGTGTGTA       |
| Tubb4A  | CACCTGCAAGCCGGTCAAT      | TCCCCATGATAGGTCCCAGTG     |
| Kif21B  | CACGACAGCCCCATCAATG      | CCGCCGTATGCTCCAGAAC       |
| Cdx2    | CAAGGACGTGAGCATGTATCC    | GTAACCACCGTAGTCCGGGTA     |
| Cacna1H | CGTGACACTGGGCATGTTC      | CCACCATCTTGATAACCATCTCC   |
| Ccnd2   | GAGTGGGAACTGGTAGTGTTG    | CGCACAGAGCGATGAAGGT       |
| Hesx1   | TGAGAGCATTTTAGGACTGGACC  | GGGTGGGTTGCCATCTTTCT      |
| Lonrf3  | CGAGGTATGGGATGGCTTTAAG   | GCTCCAGGCACAGTTTACAAA     |
| Snap23  | CGGGCTCACCAGGTTACTG      | GGCTAAACCCAGGATTCTCCTT    |
| Snap47  | TCTGATATGCGTGCTCACTCC    | GTGATCGCACCGAAGATAAAGAG   |
| Gapdh   | TCAACAGCAACTCCCACTCTTCCA | ACCACCCTGTTGCTGTAGCCGTAT  |

**Supplementary Table S2 Antibodies**

| Antibody | Source                   | Cat. No.  | Dilution (IF) | Dilution (WB) |
|----------|--------------------------|-----------|---------------|---------------|
| Nanog    | Bethyl                   | A300-397A | 1:400         | 1:5000        |
| Oct3/4   | Santa Cruz Biotechnology | sc-5279   | 1:400         | 1:5000        |

|                      |                           |           |       |         |
|----------------------|---------------------------|-----------|-------|---------|
| SSEA1                | Millipore                 | MAB4301   | 1:400 |         |
| Sox2                 | Emd millipore corporation | AB5603    | 1:400 | 1:5000  |
| LC3B                 | HuaBio                    | ET1701-65 |       | 1:20000 |
| p62                  | abcam                     | ab109012  |       | 1:4000  |
| Snap29               | abcam                     | ab138500  |       | 1:2000  |
| $\beta$ -Tubulin     | HuaBio                    | EM0103    |       | 1:2000  |
| AFP                  | HuaBio                    | R1601     | 1:100 | 1:1000  |
| $\alpha$ -SMA        | abcam                     | ab5694    | 1:200 | 1:2000  |
| $\beta$ III -Tubulin | abcam                     | ab18027   | 1:200 | 1:2000  |

IF: immunofluorescence; WB: Western blot

### Supplementary Table S3 Oligonucleotides used for knockout or knockdown

| Oligonucleotides | Sequence                                                                | experiment         |
|------------------|-------------------------------------------------------------------------|--------------------|
| Snap29 sgRNA F   | GTTCTAGGACTCCTCGCTGC                                                    | knockout           |
| Snap29 sgRNA R   | GCAGCGAGGAGTCCTAGAAC                                                    |                    |
| control shRNA F  | gatccGGCGTTCAATTAGCAGACCATTCAAGAGATGG<br>TCTGCTAATTGAACGCCTTTTTTAAGCTTg | shRNA<br>knockdown |
| control shRNA R  | aattcAAGCTTAAAAAAGCGTTCAATTAGCAGACCATC<br>TCTTGAATGGTCTGCTAATTGAACGCCg  |                    |
| Snap29 shRNA-1 F | gatccGATGAGCTGTCCGTGGGATTATTCAAGAGATA<br>ATCCCACGGACAGCTCATCTTTTTTg-    |                    |
| Snap29 shRNA-1 R | aattcAAAAAAGATGAGCTGTCCGTGGGATTATCTCTT<br>GAATAATCCCACGGACAGCTCATCg     |                    |
| Snap29 shRNA-2 F | gatccGCAGATTGAAAGAAGCCATAAATTCAAGAGAT<br>TTATGGCTTCTTTCAATCTGTTTTTTg    |                    |
| Snap29 shRNA-2 R | aattcAAAAAACAGATTGAAAGAAGCCATAAATCTCTT<br>GAATTTATGGCTTCTTTCAATCTGCg    |                    |
| siNC             | UUCUCCGAACGUGUCACGUTT                                                   |                    |
| Snap23 siRNA-1   | GGAAAGAACUAUAAGGCAATT                                                   | siRNA<br>knockdown |
| Snap23 siRNA-2   | GGAUAUGGGCAAUGAAAUUTT                                                   |                    |
| Snap23 siRNA-3   | GCAAAGAAACUCAUUGAUATT                                                   |                    |

---

|                |                       |
|----------------|-----------------------|
| Snap47 siRNA-1 | UGAUAGGACUGAUGGCAAATT |
|----------------|-----------------------|

|                |                      |
|----------------|----------------------|
| Snap47 siRNA-2 | GGAAGAUGUUGAUGAUAUTT |
|----------------|----------------------|

|                |                       |
|----------------|-----------------------|
| Snap47 siRNA-3 | CUUGAGAAGCAAUGGGUUUTT |
|----------------|-----------------------|

---
